# Supplementary material for: OCCS Classification and Treatment Algorithm for Comminuted Mandibular Fractures Based on 109 Patients and 11 Years Experiences: A Retrospective Study
Source: MDPI journal article supplement (doi:10.3390/jcm11216301), 2022-10-26
Supplement: s1 [file s1]

Supplementary Materials:

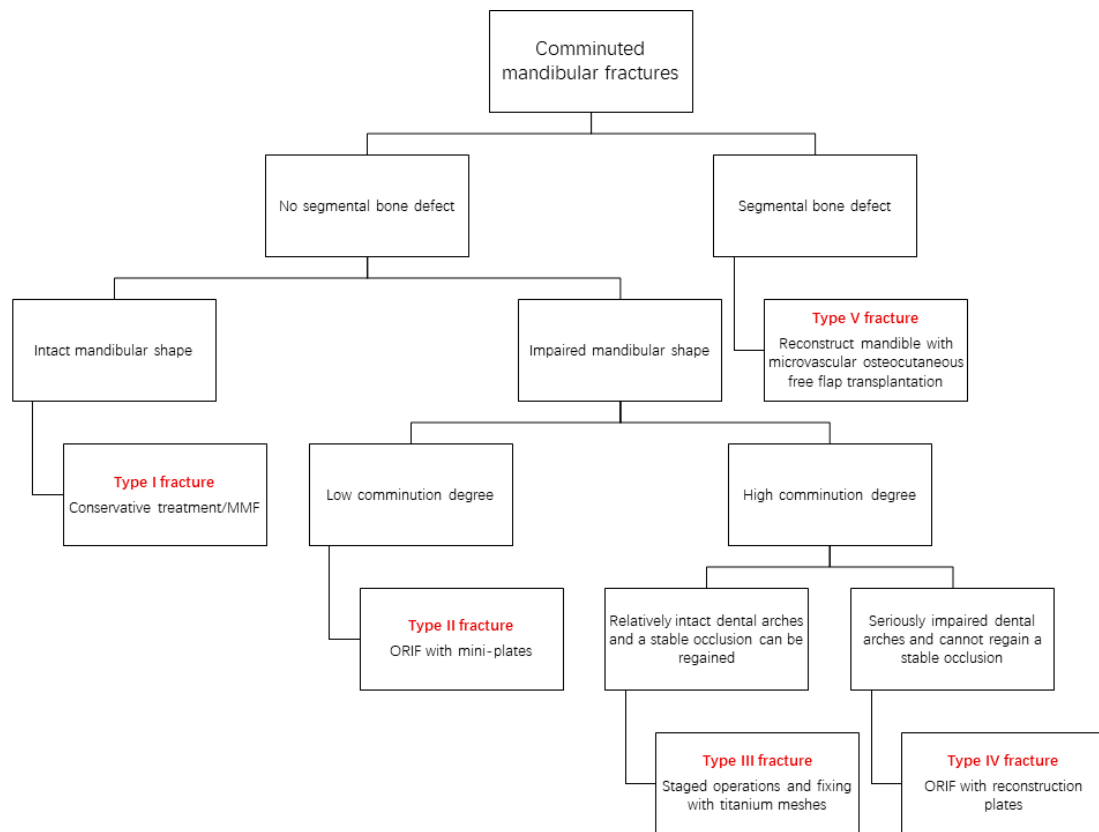

**Figure S1.** mind map of the OCCS classification for comminuted mandibular fractures.

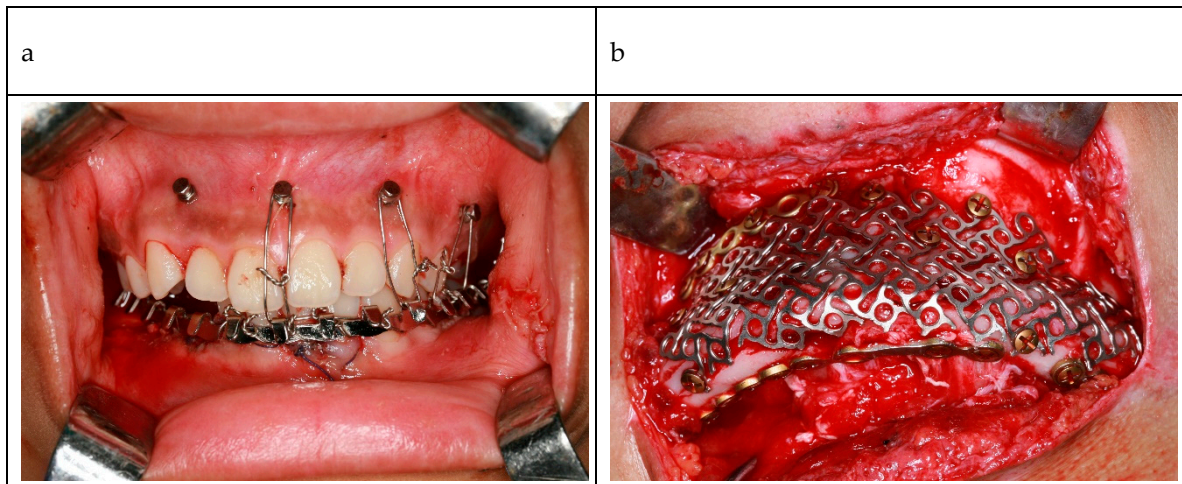

**Figure S2.** photographs of the type III fracture. (a) after stage one surgery, wound was sutured and the occlusal relationship was restored and fixed with MMF; (b) the intraoperative photograph, titanium mesh and mini-plates were used to fix the fracture site. MMF: maxillomandibular fixation.
